# Supplementary material for: C57BL/6 and A/J Mice Have Different Inflammatory Response and Liver Lipid Profile in Experimental Alcoholic Liver Disease
Source: Hindawi journal article supplement (doi:10.1155/2015/491641), 2015-01-01
Supplement: f1 [file 491641.f1.pdf]

## (A) Body parameters

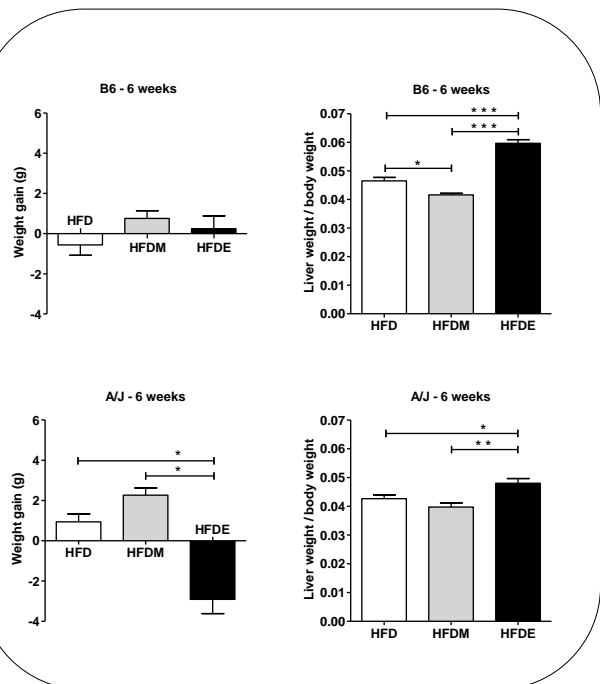

## (B) Liver steatosis

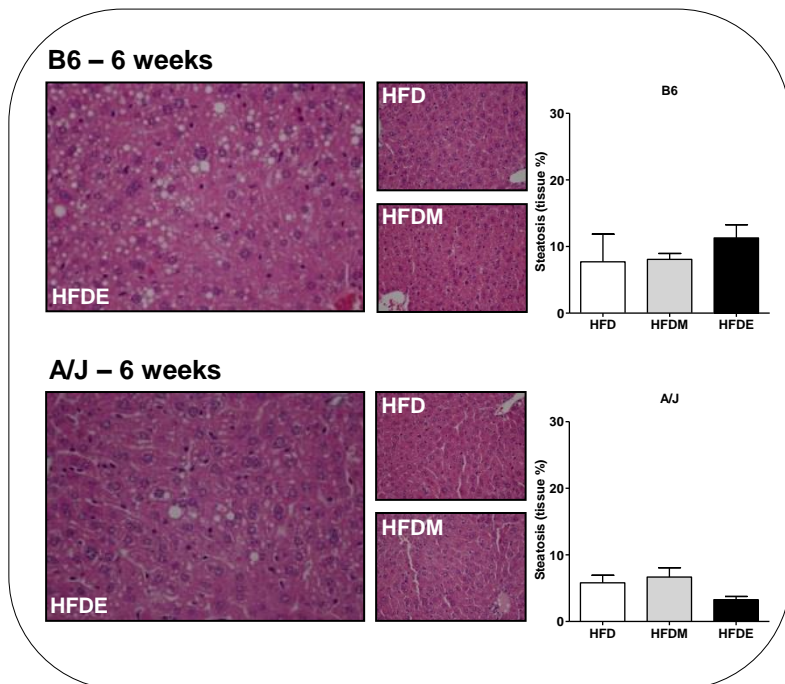

## (C) Liver lipids

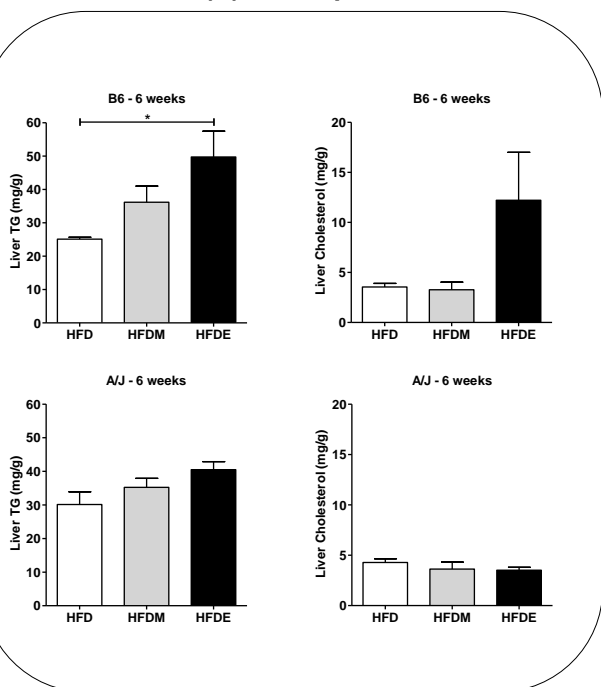

## (D) Liver cytokines

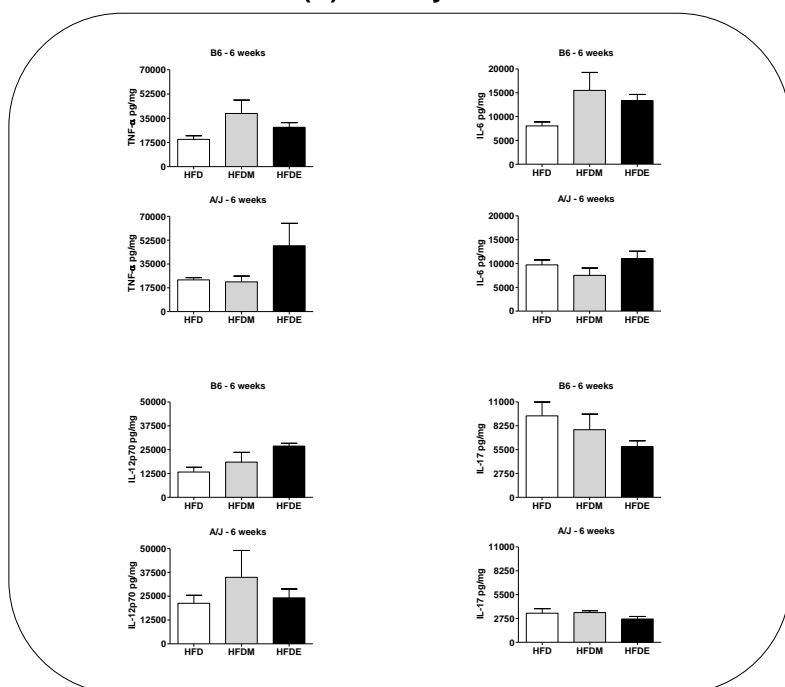

# Supplem. Fig. 2

**(A)**

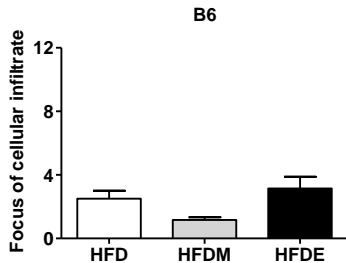

**(B)**

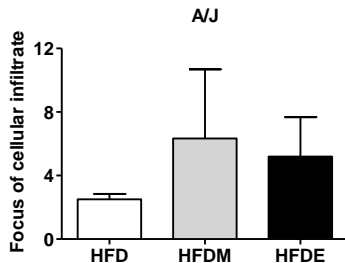

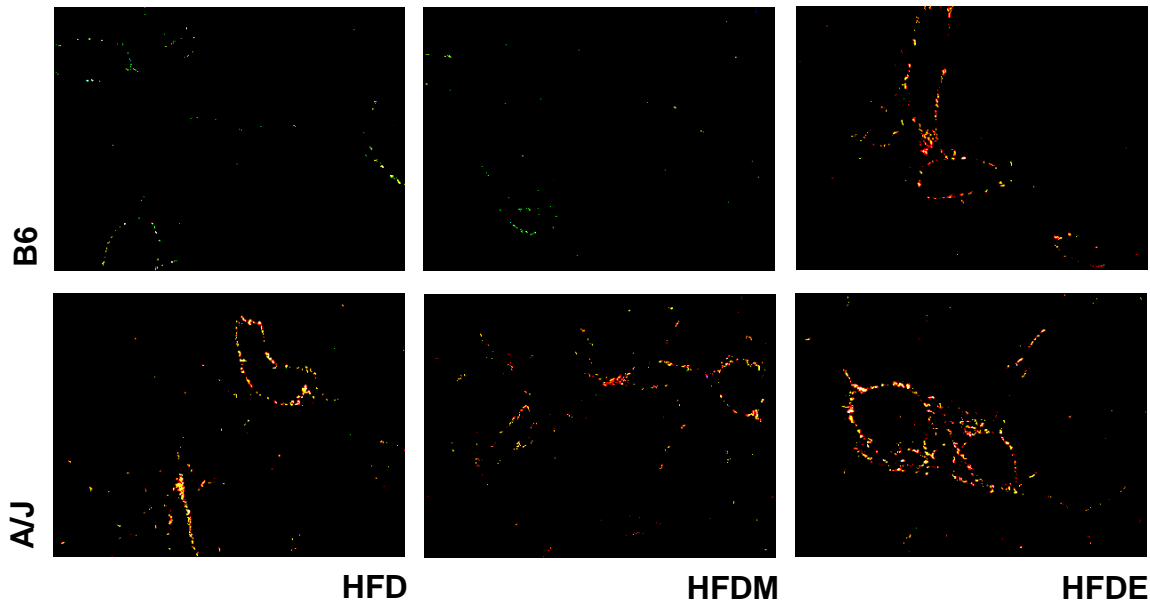

B6

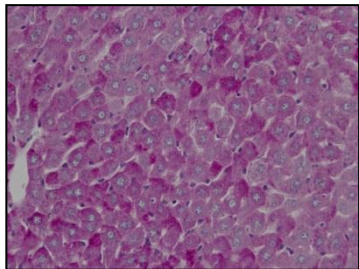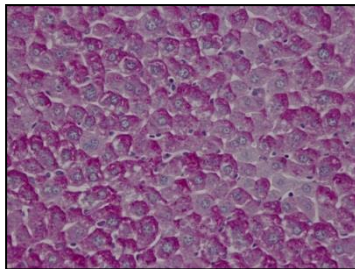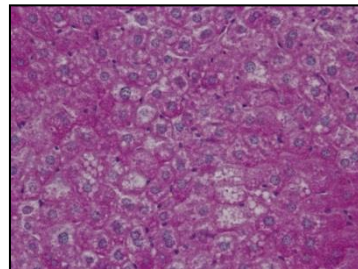

A/J

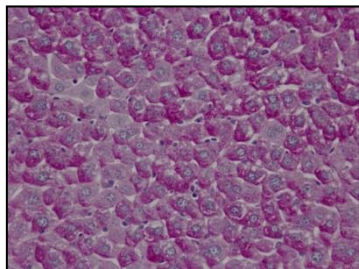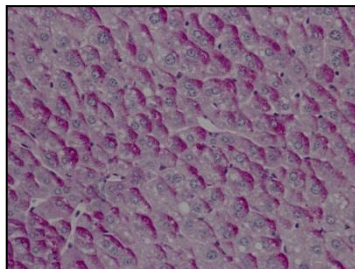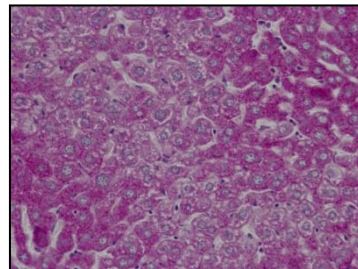

HFD

HFDM

HFDE
